# Supplementary material for: Towards low-cost, high energy density Li2MnO3 cathode materials
Source: Royal Society of Chemistry journal article supplement (doi:10.1039/c4ta02924k), 2014-11-20
Supplement: c4ta02924k1.pdf [file c4ta02924k1.pdf]

## Electronic Supplementary Information (ESI):

**Title:** Towards Low-cost, High Energy Density  $\text{Li}_2\text{MnO}_3$  Cathode Materials

Xin Dong, Youlong Xu,\* Shen Yan, Shengchun Mao, Lilong Xiong, and Xiaofei Sun

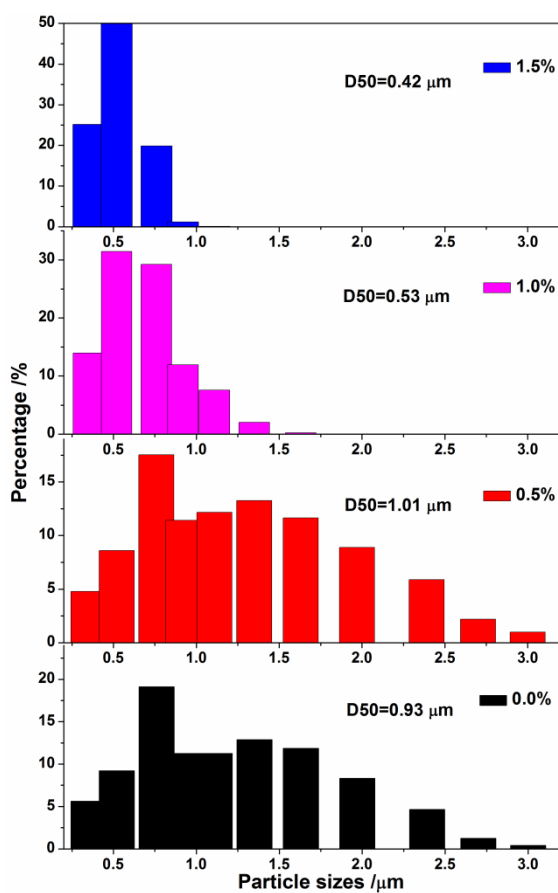

Fig. S1. The particle size distribution and the D50 of  $\text{Li}_2\text{MnO}_3\text{-F}_x$ .

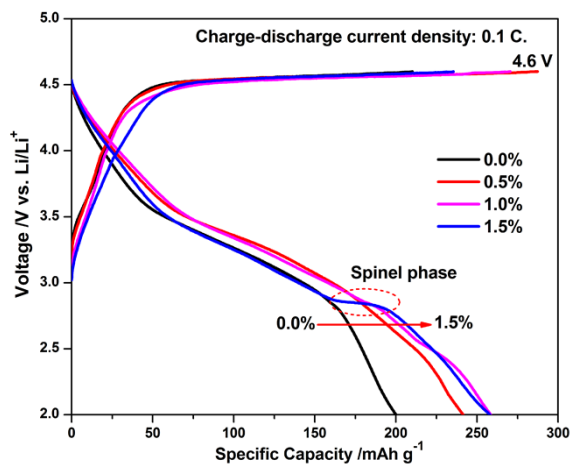

Fig. S2. The initial voltage profiles of  $\text{Li}_2\text{MnO}_{3-x}\text{F}_x$  obtained at 0.1 C.

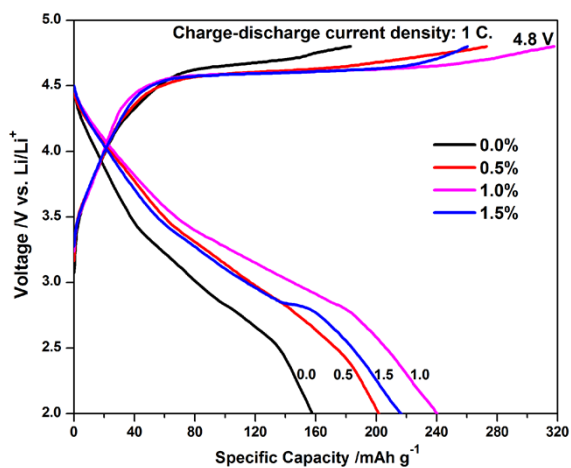

Fig. S3. The initial voltage profiles of  $\text{Li}_2\text{MnO}_{3-x}\text{F}_x$  obtained at 1 C between 2.0 and 4.8 V.

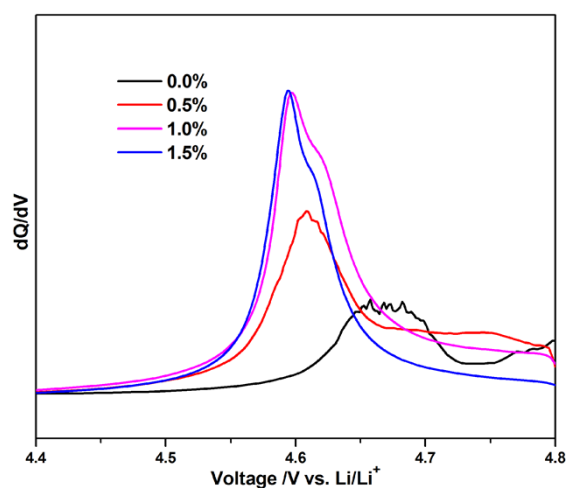

Fig. S4. The  $dQ/dV$  plots of  $\text{Li}_2\text{MnO}_{3-x}\text{F}_x$  between 4.4 and 4.8 V in the initial charge process with the rate of 1 C.

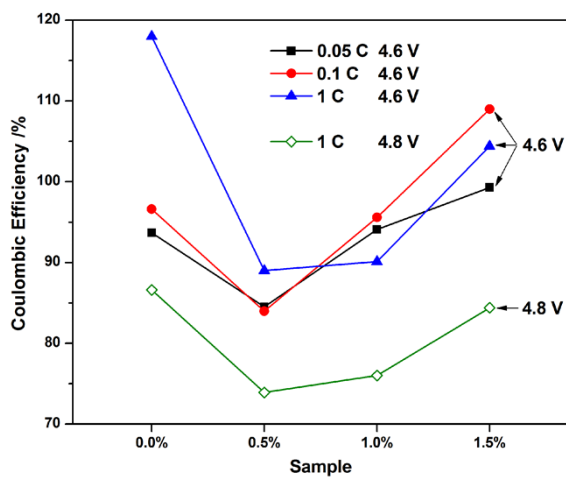

Fig. S5. The first coulombic efficiencies of  $\text{Li}_2\text{MnO}_{3-x}\text{F}_x$  under different rates and cut-off voltages.

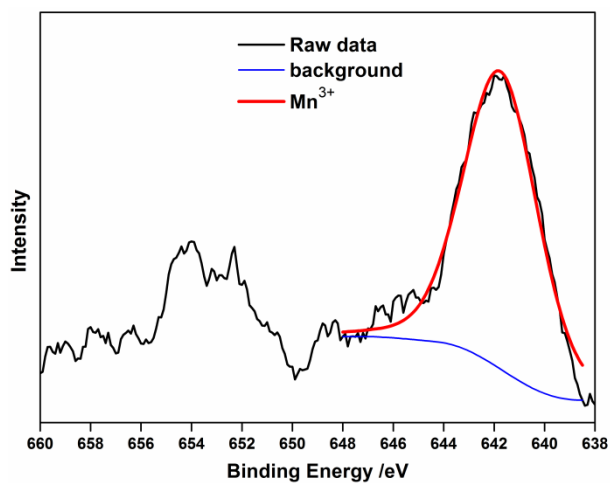

Fig. S6. The fitted XPS spectra of Mn 2p<sub>3/2</sub> of the 1.0% sample after discharged to 2.0 V.

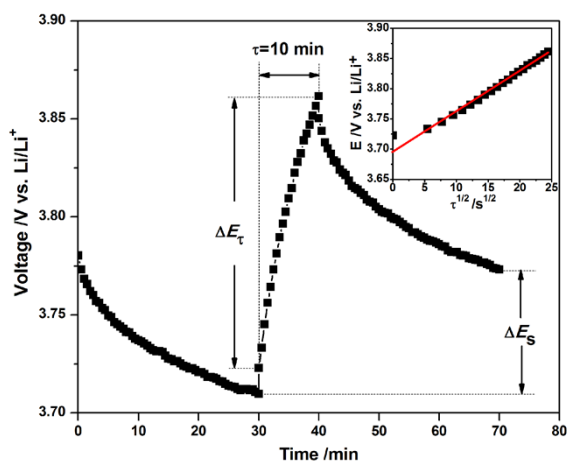

Fig. S7. The resulting voltage profile for a single titration of  $\text{Li}_2\text{MnO}_3$  around 3.7 V and the relationship between the cell voltage and  $\tau^{1/2}$  during the charge period.
